# Supplementary material for: Avian Intestinal Mucus Modulates Campylobacter jejuni Gene Expression in a Host-Specific Manner
Source: PubMed Central journal article supplement (PMC6338021; doi:10.3389/fmicb.2018.03215), 2019-01-07
Supplement: Table_1.pdf [file Table_1.pdf]

**Supplementary table 1. Monosaccharide and sialic acid composition of purified mucus (ng/ $\mu$ g)**

|                                         | Chicken<br>Mucus | Turkey<br>Mucus | Cow<br>Mucus | Pig<br>Mucus | Sheep<br>Mucus |
|-----------------------------------------|------------------|-----------------|--------------|--------------|----------------|
| Fucose                                  | 15.29            | 21.63           | 14.09        | 13.69        | 10.31          |
| N-Acetyl-galactosamine                  | 5.3              | 7.22            | 3.11         | 13.64        | 6.08           |
| N-Acetyl-glucosamine                    | 42.72            | 54.25           | 33.18        | 28.96        | 20.5           |
| Galactose                               | 24.67            | 28.52           | 23.38        | 20.17        | 14.28          |
| Glucose                                 | 5.15             | 9.43            | 4.06         | 18           | 5.3            |
| Mannose                                 | 15.44            | 21.13           | 15.84        | 19.79        | 13.36          |
| N-Glycolylneuraminic acid (sialic acid) | 0                | 0               | 2            | 2.3          | 0.8            |
| N-Acetylneuraminic acid (sialic acid)   | 2.7              | 6.1             | 0.6          | 2.2          | 1.5            |
